# Supplementary material for: A Ru(II)-Strained Complex with 2,9-Diphenyl-1,10-phenanthroline Ligand Induces Selective Photoactivatable Chemotherapeutic Activity on Human Alveolar Carcinoma Cells via Apoptosis
Source: MDPI journal article supplement (doi:10.3390/ph17010050), 2023-12-28
Supplement: s1 [file s1]

## Supplementary Information

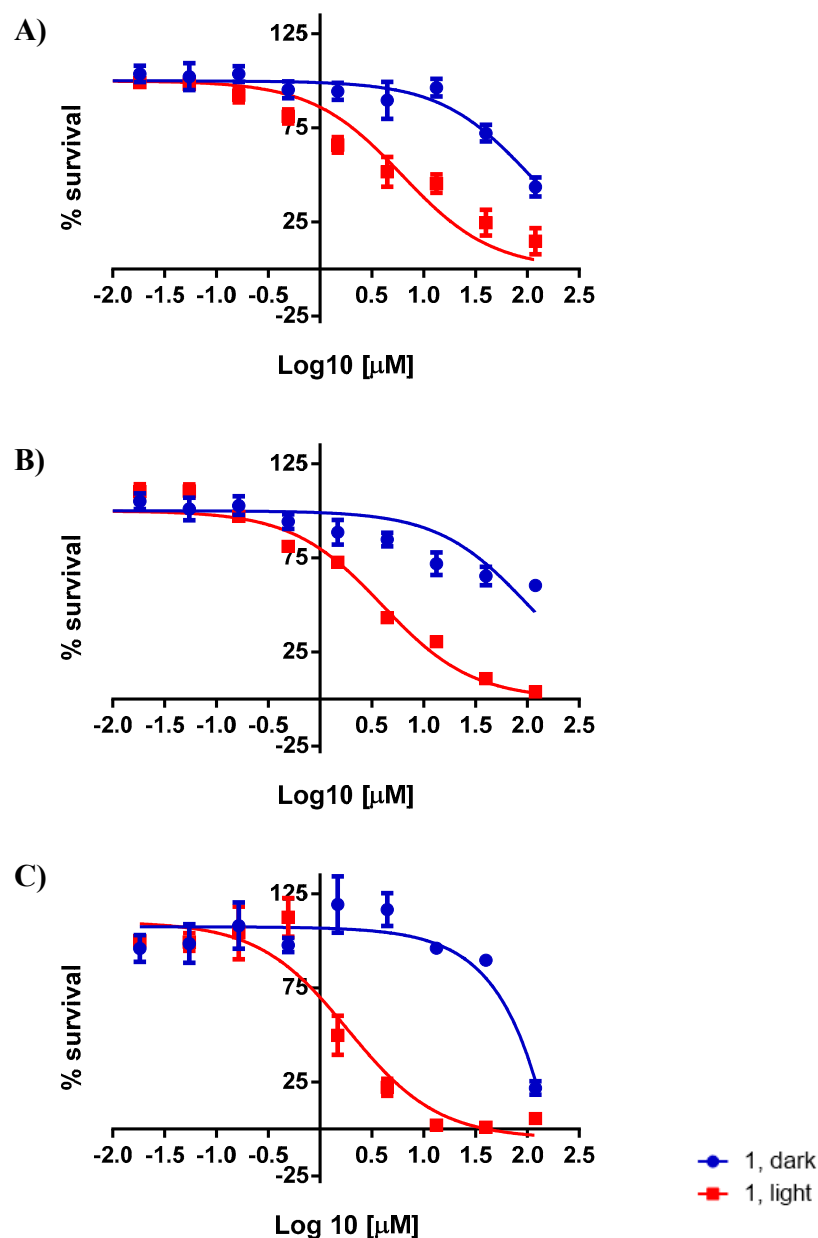

**Figure S1. Complex 1 Cytotoxicity effect on A459 cells after 24, 48 and 72h with or without light activation.** Treatment with complex 1 was completed using 3-fold dilutions starting with a highest concentration of 120  $\mu\text{M}$ . Cells were then incubated with different concentrations of complex 1 in both dark and light conditions for 24, 48 or 72 h and cell viability was quantified. Data obtained were expressed as the percentage of surviving cells as a function of log (concentration) of complex 1. The mean  $\pm$  SEM values were calculated from three separate experiments, each performed in triplicate. Complex 1 showed an increase in cytotoxicity between dark and light conditions with longer incubation time.

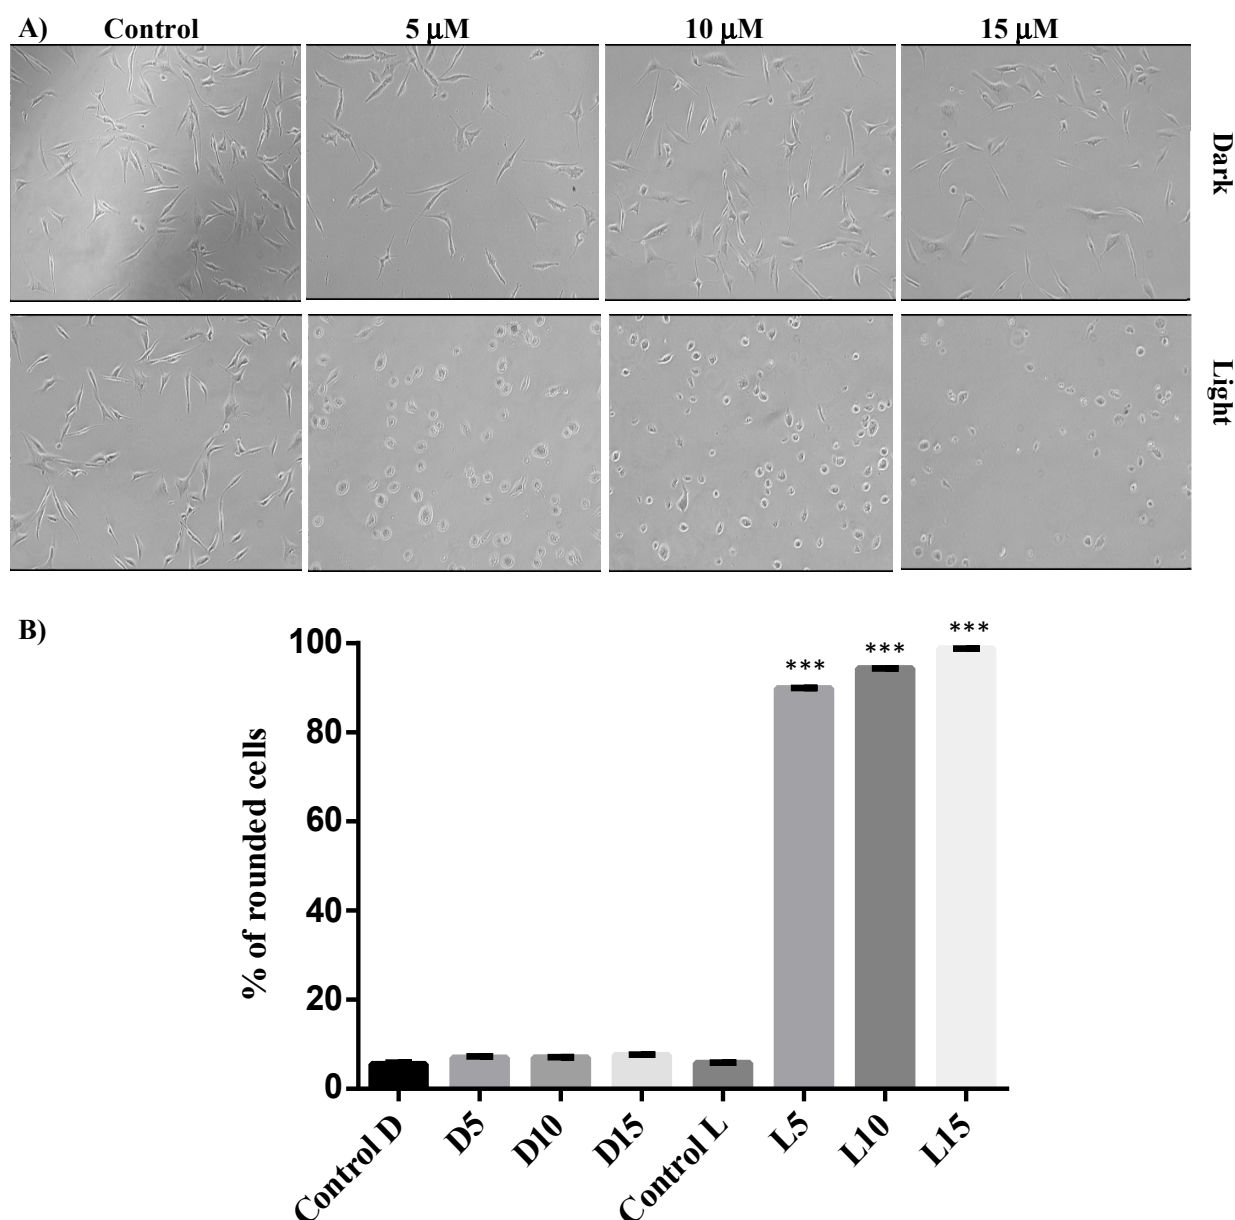

**Figure S2. Morphological changes and cell rounding on A549 cells upon treatment with different concentration of complex 1 after 24h.** (A). Representative images of A549 cells, as seen by an inverted light microscope. Cells were maintained in DMEM supplemented with 10% FBS and treated in the absence (control) or with 5, 10 and 15  $\mu$ M of complex 1 in both dark and light conditions for 24h. A total of 10 images were evaluated for each condition and compared to control cells. (B). The percentage of cell rounding with and without treatment with complex 1 was measured using CASP software and the mean  $\pm$  SEM was calculated from 3 different experiments. Results showed that treatment with complex 1 lead to significant increase in cell rounding, as indicated by \*\*\* ( $p < 0.001$ ) when compared to control cells.

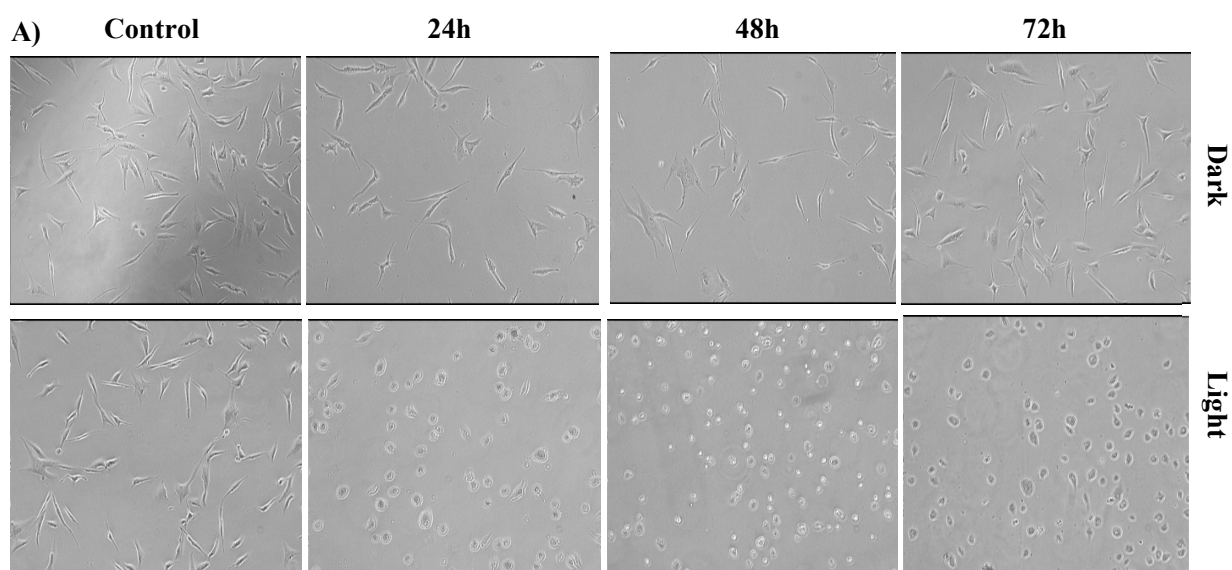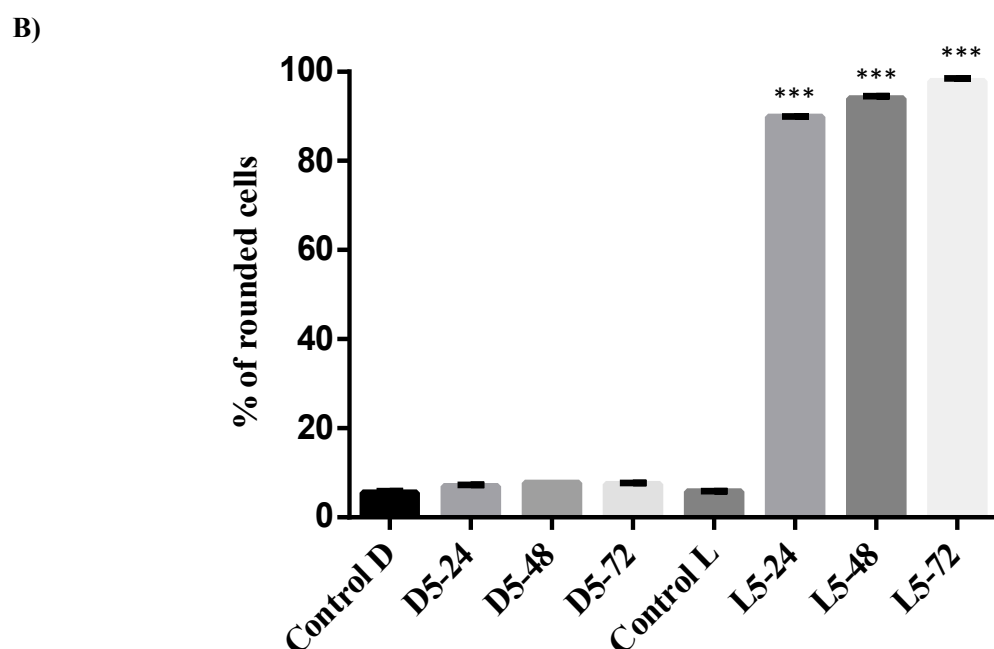

**Figure S3. Morphological changes and cell rounding on A549 cells upon treatment with 5  $\mu$ M of complex 1 for 24, 48 and 72h. (A).** Representative images of A549 cells, as seen by an inverted light microscope. Cells were maintained in DMEM supplemented with 10% FBS and treated in the absence (control) or with 5  $\mu$ M of complex 1 in both dark and light conditions for 24, 48 or 72 h. A total of 10 images were evaluated for each condition and compared to control cells. **(B).** The percentage of cell rounding with and without treatment with complex 1 was measured using CASP software and the mean  $\pm$  SEM was calculated from 3 different experiments. Results showed that treatment with complex 1 lead to significant increase in cell rounding, as indicated by \*\*\* ( $p < 0.001$ ) when compared to control cells.

**Table S1.** DNA damage in A549 cells exposed to 5  $\mu$ M of complex 1 as measured by the comet assay after 24, 48 and 72h post exposure. The analysis was performed using CASP (Comet assay Software package).

|                         | Incubation time (h) | Negative Control  | Treated in Dark   | Treated in Light   | Positive Control    |
|-------------------------|---------------------|-------------------|-------------------|--------------------|---------------------|
| <b>Head Length</b>      | 24                  | 129.35 $\pm$ 4.98 | 132.66 $\pm$ 0.93 | 101 $\pm$ 1.34*    | 125.8 $\pm$ 4.28*   |
|                         | 48                  | 78 $\pm$ 4.92     | 87.55 $\pm$ 6.35  | 117.5 $\pm$ 7.49*  | 85.66 $\pm$ 8.96    |
|                         | 72                  | 115 $\pm$ 5.95    | 116.56 $\pm$ 8.98 | 110 $\pm$ 1.28     | 79.23 $\pm$ 4.45*   |
| <b>Tail Length</b>      | 24                  | 9.98 $\pm$ 2.34   | 8.33 $\pm$ 2.19   | 48.33 $\pm$ 2.52*  | 59.6 $\pm$ 2.62*    |
|                         | 48                  | 5.27 $\pm$ 3.68   | 7.64 $\pm$ 3.97   | 40.5 $\pm$ 2.62*   | 75.5 $\pm$ 5.32*    |
|                         | 72                  | 11.6 $\pm$ 2.01   | 9.22 $\pm$ 2.25   | 58.67 $\pm$ 1.42*  | 70.31 $\pm$ 2.20*   |
| <b>Comet Length</b>     | 24                  | 139.33 $\pm$ 5.51 | 140.99 $\pm$ 4.78 | 149.33 $\pm$ 2.87* | 185.4 $\pm$ 6.78*   |
|                         | 48                  | 83.27 $\pm$ 5.11  | 95.19 $\pm$ 6.14  | 158 $\pm$ 6.46*    | 161.16 $\pm$ 12.11* |
|                         | 72                  | 126.60 $\pm$ 6.22 | 125.78 $\pm$ 8.91 | 168.67 $\pm$ 2.7*  | 149.54 $\pm$ 5.23*  |
| <b>Head DNA content</b> | 24                  | 97.87 $\pm$ 3.41  | 97.04 $\pm$ 2.45  | 80.07 $\pm$ 0.68*  | 57.03 $\pm$ 0.86*   |
|                         | 48                  | 98.07 $\pm$ 4.83  | 98.57 $\pm$ 3.45  | 72.48 $\pm$ 2.18*  | 49.1 $\pm$ 3.37*    |
|                         | 72                  | 95.27 $\pm$ 3.4   | 97.08 $\pm$ 3.48  | 60.39 $\pm$ 3.6*   | 41.75 $\pm$ 1.94*   |
| <b>Tail DNA content</b> | 24                  | 2.13 $\pm$ 3.41   | 2.96 $\pm$ 3.04   | 19.93 $\pm$ 3.68*  | 42.97 $\pm$ 3.86*   |
|                         | 48                  | 1.93 $\pm$ 2.83   | 1.43 $\pm$ 2.45   | 27.52 $\pm$ 2.18*  | 50.90 $\pm$ 3.37*   |
|                         | 72                  | 4.73 $\pm$ 2.4    | 2.92 $\pm$ 2.48   | 39.61 $\pm$ 4.6*   | 58.25 $\pm$ 1.94*   |
| <b>Tail Moment</b>      | 24                  | 0.21 $\pm$ 0.07   | 0.24 $\pm$ 0.06   | 9.63 $\pm$ 0.09*   | 25.61 $\pm$ 0.10*   |
|                         | 48                  | 0.11 $\pm$ 0.1    | 0.10 $\pm$ 0.09   | 11.14 $\pm$ 0.5*   | 38.42 $\pm$ 0.18*   |
|                         | 72                  | 0.54 $\pm$ 0.4    | 0.27 $\pm$ 0.5    | 23.24 $\pm$ 0.6*   | 40.95 $\pm$ 0.4*    |

The results of the comet assay were analyzed using one-way ANOVA on GraphPad Prism, and the differences between the negative control (untreated) cells and treated cells were determined. \* indicates significant differences ( $P < 0.05$ ) between the different conditions. The mean  $\pm$  SEM was calculated from 50 randomly selected images.

## LC-MS/MS parameters

LC-MS/MS instrument parameters were previously reported [1]. Briefly, LC-MS/MS data were acquired using the Ultimate 3000 RSLC/TSQ Endura system from Thermo Fisher Scientific. Complex **1** (1  $\mu\text{L}$ ) was injected on a Hypersil GOLD C8 column maintained at 40 °C. An isocratic mobile phase was used, consisting of 5 % A ( $\text{H}_2\text{O}$  containing 0.1% Formic acid) and 95 % B (MeOH containing 0.1% Formic acid), at 0.5  $\text{mL min}^{-1}$ . MS-MS spectra were then acquired in positive mode following sample injection into the heated ESI probe [sheath gas (2.71  $\text{L min}^{-1}$ ), aux gas (5.78  $\text{L min}^{-1}$ ), sweep gas (1.5  $\text{L min}^{-1}$ ), ion transfer tube temperature (325 °C), vaporizer temperature (200 °C), positive ion spray voltage (3700 V)]. LC-MS/MS conditions are listed in Table S2. Data were processed using the Xcalibur software from Thermo Fisher Scientific (v. 4.1).

**Table S2.** LC-MS/MS conditions used for the detection of Complex **1**, as previously described [1].

| Mobile Phase                                  |                     |
|-----------------------------------------------|---------------------|
| Isocratic                                     |                     |
| 5% A: $\text{H}_2\text{O}$ (0.1% Formic acid) |                     |
| 95% B: MeOH (0.1% Formic acid)                |                     |
| Flow rate (0.5 $\text{mL min}^{-1}$ )         |                     |
| Column oven set at 40 °C                      |                     |
| Precursor ion (m/z)                           | 373.2               |
| Product ions (m/z)                            | 157.1               |
|                                               | 294.4               |
| Collision energy (V)                          | 20                  |
| Retention time (min)                          | 0.45                |
| Mass mode                                     | H-ESI positive mode |
| Scan type                                     | SRM <sup>a</sup>    |

<sup>a</sup>SRM, selected reaction monitoring

## References

1. Mehanna, S.; Bodman-Smith, K.; Daher, C.F.; Khnayzer, R.S. Rapid Quantification of Ruthenium(II) Polypyridyl Anti-Cancer Drugs Using a Selective Ligand Dissociation LC-MS/MS Method. *Anal. Methods* **2020**, doi:10.1039/D0AY01250E.
